# Supplementary material
Source: PubMed Central journal article supplement (PMC10110493)
Supplement: develop-150-201095-s1.pdf [file develop-150-201095-s1.pdf]

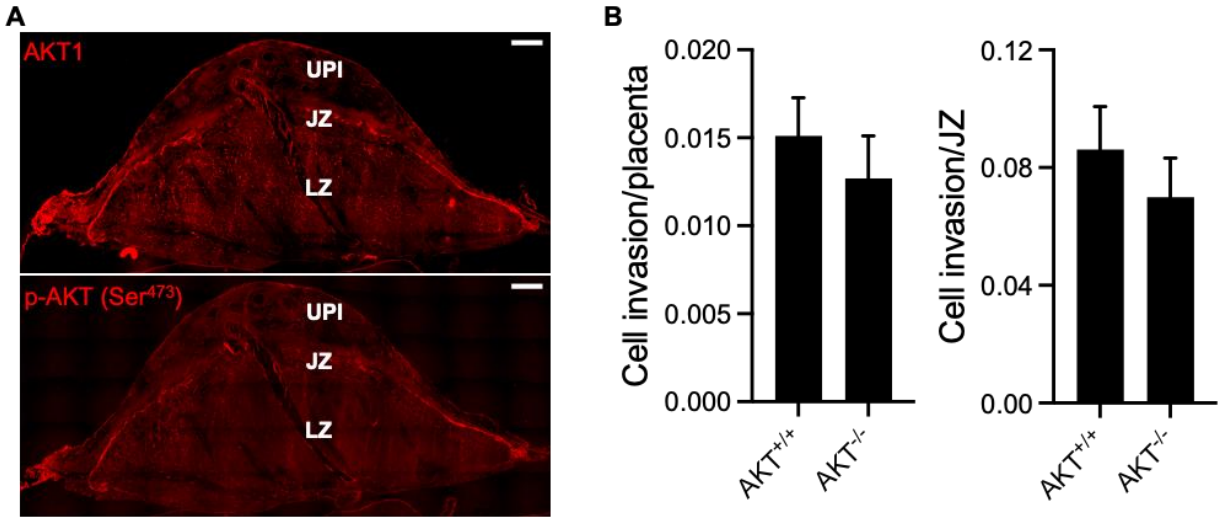

**Fig. S1. Placental AKT protein distribution and intrauterine trophoblast cell invasion in wild type and *Akt1* null placentation sites.** **A)** Distribution of AKT1 (top) and phospho (p)-AKT4 (Ser<sup>473</sup>) proteins (bottom) in the gestation day (**gd**) 18.5 placentation site. **B)** Area occupied by invasive trophoblast cells (cytokeratin-positive cells) within the uterine-placental interface was quantified and is presented relative to areas associated with the entire placenta or the junctional zone (**JZ**). Graphs represent means ± SEM (n = 6/group).

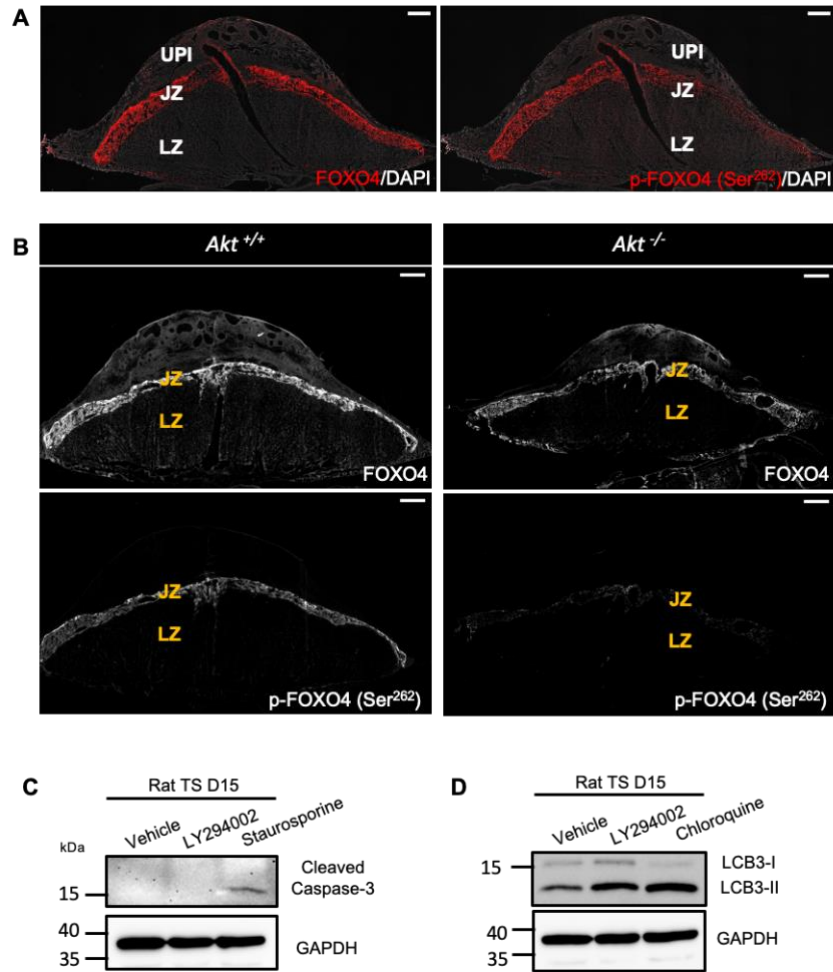

**Fig. S2. Relationship of PI3K/AKT signaling to FOXO4 distribution and functions. A)** Distributions of FOXO4 and phospho (p)-FOXO4 (Ser<sup>262</sup>) proteins in gestation day (gd) placentation sites. **B)** Distribution of FOXO4 and phospho (p)-FOXO4 (Ser<sup>262</sup>) proteins in *Akt*<sup>+/+</sup> and *Akt*<sup>-/-</sup> placentas at gd 18.5. UPI: uterine-placental interface; JZ: junctional zone; and LZ: labyrinth zone. **C)** Western blot analysis of cleaved caspase-3 in rat TS cells exposed to vehicle (DMSO), LY294002 (10  $\mu$ M), or staurosporine (1  $\mu$ M). Staurosporine was used as a positive control. **D)** Western blot analysis for serine palmitoyltransferase long chain base subunit 3 (LCB3) in rat TS cells exposed to vehicle (DMSO), LY294002 (10  $\mu$ M), or chloroquine (50  $\mu$ M). Chloroquine was used as a positive control. Please note that inhibition of PI3K/AKT signaling did not have a detectable effect on the formation of cleaved caspase-3 but did have a modest effect on LCB3 accumulation.

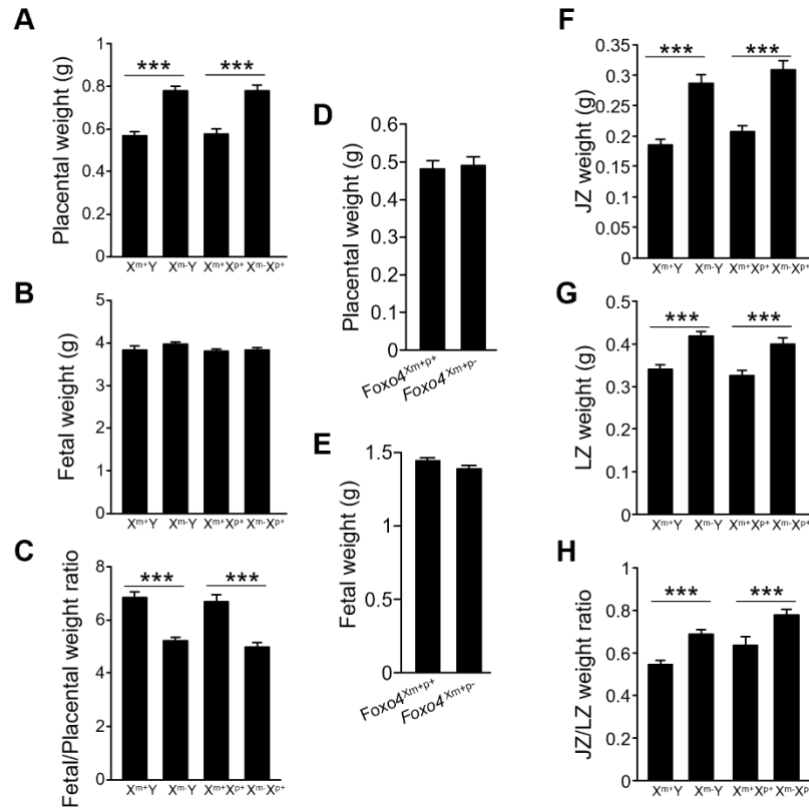

**Fig. S3.** Placentas (**A**) and fetuses (**B**) were dissected from *Foxo4* heterozygous females mated with wild type males at gd 20.5 and weighed; **C**, fetus/placenta ratio. Placentas (**D**) and fetuses (**E**) were dissected from wild type females mated with *Foxo4* hemizygous null males at gd 18.5 and weighed. **F-H**) Placentas from heterozygous females mated with wild type males were then separated into junctional zone (**JZ**, **F**) and labyrinth zone (**LZ**, **G**) compartments, and weighed; **H**, JZ/LZ weight ratio.  $X^{m+}Y$ ,  $n = 19$ ;  $X^{m-}Y$ ,  $n = 22$ ;  $X^{m+}X^{p+}$ ,  $n = 15$ ;  $X^{m-}X^{p+}$ ,  $n = 15$  from 6 dams. Graphs represent means  $\pm$  SEM. Asterisks denote statistical differences (\*\*\*)  $P < 0.001$  as determined by Student's or Welch's *t*-test.

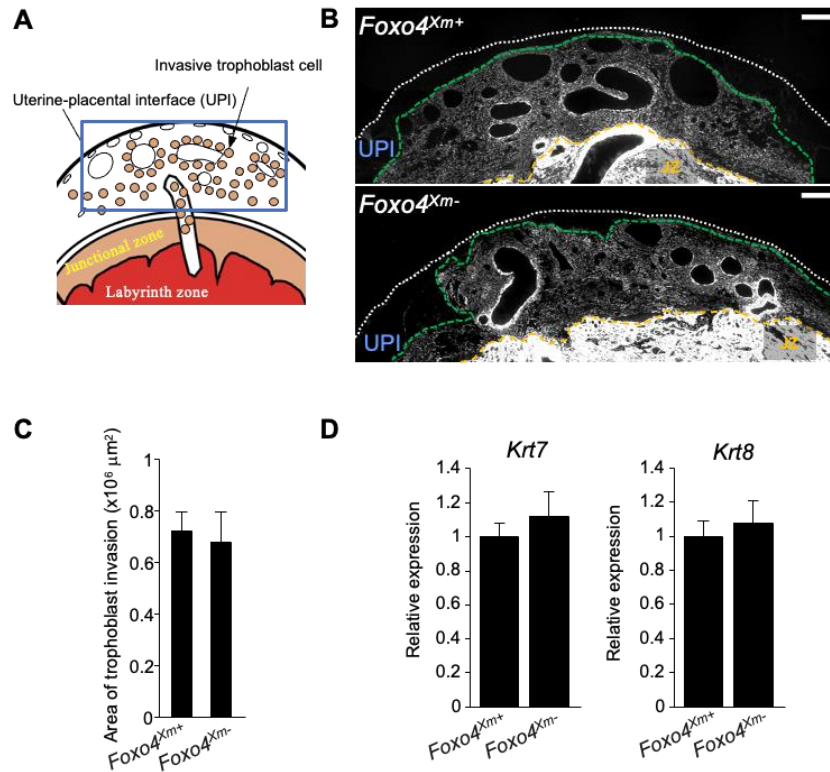

**Fig. S4. FOXO4 deficiency does not affect either intrauterine trophoblast invasion or the intrauterine invasive trophoblast cell phenotype.** **A)** Schematic representation of a late gestation placentation site. The uterine-placental interface, site for intrauterine trophoblast invasion, is highlighted in the boxed area. **B)** Trophoblast cells were immunostained for pan-cytokeratin (**KRT**). Representative images are shown. The extent of intrauterine trophoblast invasion is demarcated using a green dashed line. The white dotted line represents the outer border of the uterus, and the yellow dashed line represents the uterine border with the placenta. Scale bars = 500  $\mu\text{m}$ . **C)** The area of intrauterine trophoblast invasion is graphically depicted ( $n = 6/\text{group}$ ). Graphs represent means  $\pm$  SEM. **D)** RT-qPCR measurements of *Krt7* and *Krt8* transcripts, signature markers for invasive trophoblast cells, within dissected uterine-placental interface tissue specimens at gd 18.5 (*Foxo4<sup>Xm+</sup>*,  $n = 12$ ; *Foxo4<sup>Xm-</sup>*,  $n = 12$ ). Graphs represent means  $\pm$  SEM.

**Table S1. Genotype of offspring following *Akt1* heterozygous breeding.**

| Offspring from<br><i>Akt1</i> <sup>+/-</sup> x <i>Akt1</i> <sup>+/-</sup> | Offspring genotype         |                            |                            |
|---------------------------------------------------------------------------|----------------------------|----------------------------|----------------------------|
|                                                                           | <i>Akt1</i> <sup>+/+</sup> | <i>Akt1</i> <sup>+/-</sup> | <i>Akt1</i> <sup>-/-</sup> |
| Total                                                                     | 40                         | 92                         | 42                         |
| Ratio (%)                                                                 | 23                         | 52.9                       | 24.1                       |

**Table S2. RNAseq AKT1 WT vs KO JZ**

[Click here to download Table S2](#)

**Table S3. AKT KO JZ Pathway analysis**

[Click here to download Table S3](#)

**Table S4. Genotype of offspring following *Foxo4* hemizygous male x wild type female breeding.**

| Offspring from<br><b>X<sup>-</sup>Y x XX</b> | Offspring genotype     |                                     |
|----------------------------------------------|------------------------|-------------------------------------|
|                                              | <b>X<sup>m+</sup>Y</b> | <b>X<sup>m+</sup>X<sup>p-</sup></b> |
| Total                                        | 40                     | 44                                  |
| Ratio (%)                                    | 47.6                   | 52.4                                |

**Table S5. RNAseq Foxo4 WT vs KO JZ**

[Click here to download Table S5](#)

**Table S6. Foxo4 KO JZ Pathway analysis**

[Click here to download Table S6](#)

**Table S7. RNAseq Foxo4 KD in rTSC**

[Click here to download Table S7](#)

**Table S8. Foxo4 KD rTS Pathway analysis**

[Click here to download Table S8](#)

**Table S9. Primers used for genotyping**

| Primer name       | Sequence                 |
|-------------------|--------------------------|
| <i>Akt1</i> Fwd   | TGAGTCCATTCTGGAGGACTAGAC |
| <i>Akt1</i> Rev1  | TTGCCAGTAGCTTCAGGTA      |
| <i>Akt1</i> Rev2  | GAGGGAAGGTTAGGGACTAGCC   |
| <i>Foxo4</i> Fwd  | AGAAGGTACCCACGGAGGGA     |
| <i>Foxo4</i> Rev1 | CCACACAGTTCCTGCTGTACATAG |
| <i>Foxo4</i> Rev2 | CTCCTTGGAGTGGCACCTTC     |

Fwd, forward

Rev, reverse

**Table S10. List of primers used for RT-qPCR**

| Gene           | Forward primer            | Reverse primer            | Accession no.  | Amplicon size (bp) |
|----------------|---------------------------|---------------------------|----------------|--------------------|
| <i>Ccn3</i>    | CATGGTTCGGCCTTGTGAG       | TGGATTTACAGGACTTCTTGGT    | NM_030868.2    | 89                 |
| <i>Cend1</i>   | AATGCCAGAGGCGGATGAGA      | CGTTGTGCGGTAGCAGGAGA      | NM_171992.5    | 190                |
| <i>Ccne1</i>   | TGCAGGCGAGGATGAGA         | GAAGTCCTGTGCCAAGTAGAATG   | NM_001100821.1 | 98                 |
| <i>Cdc6</i>    | CAGGCGAGCTATTGAAATTGTG    | GACTTGGGATATGTGAGCGAGA    | NM_001108298.1 | 130                |
| <i>Cdk1</i>    | GTTGACATCTGGAGCATAGG      | CTCTACTTCTGGCCCACTT       | NM_019296.2    | 144                |
| <i>Mcm5</i>    | TGTCAGGATTTACCAAACA       | CACTTGAGGCGGTAAAGCAC      | NM_001399204.1 | 123                |
| <i>Prl8a4</i>  | CTGAAACCCTCTGTAATCTTGCTG  | GTCTCGTCCCTCTAATCAGTTTG   | NM_021580.1    | 112                |
| <i>Krt7</i>    | CGGAATGGAACCTGTGAA        | GTAGATGTAGTCTTGATGGAATAAG | NM_001047870.2 | 150                |
| <i>Krt8</i>    | TGGGCCAGGAGAAGCTGAA       | CACATCCTTGATGAGGACAAA     | NM_199370.1    | 140                |
| <i>Foxo4</i>   | CGGAATGCCTGGGGAAA         | ATGTACCTTGATGAACCTTGCTGTG | NM_001106943.1 | 213                |
| <i>Grb7</i>    | TACCACCTGGAGAGAAGAGAGAGAG | GGGCTCAGATCCAGTTCCA       | NM_053403.2    | 141                |
| <i>ErbB3</i>   | TGCGTTGCCAGTTGTCC         | CCGTGCTTATCTACTCCATCTTGT  | NM_017218.3    | 92                 |
| <i>JamL</i>    | TCGGCCTTGATGGGATG         | CACGCTGAGGCTGGAGTAGTAG    | XM_032909807.1 | 129                |
| <i>Lpal2</i>   | AAGGAGATGCCAACCAACAAA     | GCCATTCTCCCTCCTGA         | NM_001109578.1 | 125                |
| <i>Mmp12</i>   | GCTGGTTCGGTTGTTAGG        | GTAGTTACACCCTGAGCATAC     | NM_053963.2    | 100                |
| <i>Gstm1</i>   | CTGGACGCCTTCCAAA          | TAGCAAGGGCCTACTTGTACTCC   | NM_017014.2    | 145                |
| <i>Txnip</i>   | GTCTCAGCAGTGCAAACAGACC    | AAGCTCAAAGCCGAACCTTGTACTC | NM_001008767.2 | 139                |
| <i>Alox5ap</i> | TGTGGGCAATGTTGTGCTC       | GCTTTGCGCCTTGCTTTC        | NM_017260.2    | 100                |
| <i>Nupr1</i>   | GCCCACTTCCAGCA            | ACCTCCACCGACGACATAAGA     | NM_053611.2    | 102                |
| <i>Gapdh</i>   | GACATGCCGCCTGGAGAAAC      | AGCCCAGGATGCCCTTGTAGT     | NM_017008.4    | 92                 |

**Table S11. shRNA sequences**

| shRNA                | Sequence                                                  |
|----------------------|-----------------------------------------------------------|
| <i>Foxo4</i> shRNA 1 | CCGGTGCAGTCCTTGTCTCGAACTCGAGTTTCGAGGACAAGGACTGCTTTTTG     |
| <i>Foxo4</i> shRNA 2 | CCGGTGTGCTTGCATCTCCTACTGAACTCGAGTTCAGTAGGAGATGCAAGCTTTTTG |
